# Supplementary material for: Mediterranean diet and physical functioning trajectories in Eastern Europe: Findings from the HAPIEE study
Source: PubMed Central journal article supplement (PMC6042732; doi:10.1371/journal.pone.0200460), 2018-07-12
Supplement: pone.0200460.s002.pdf [file pone.0200460.s002.pdf]

# Women

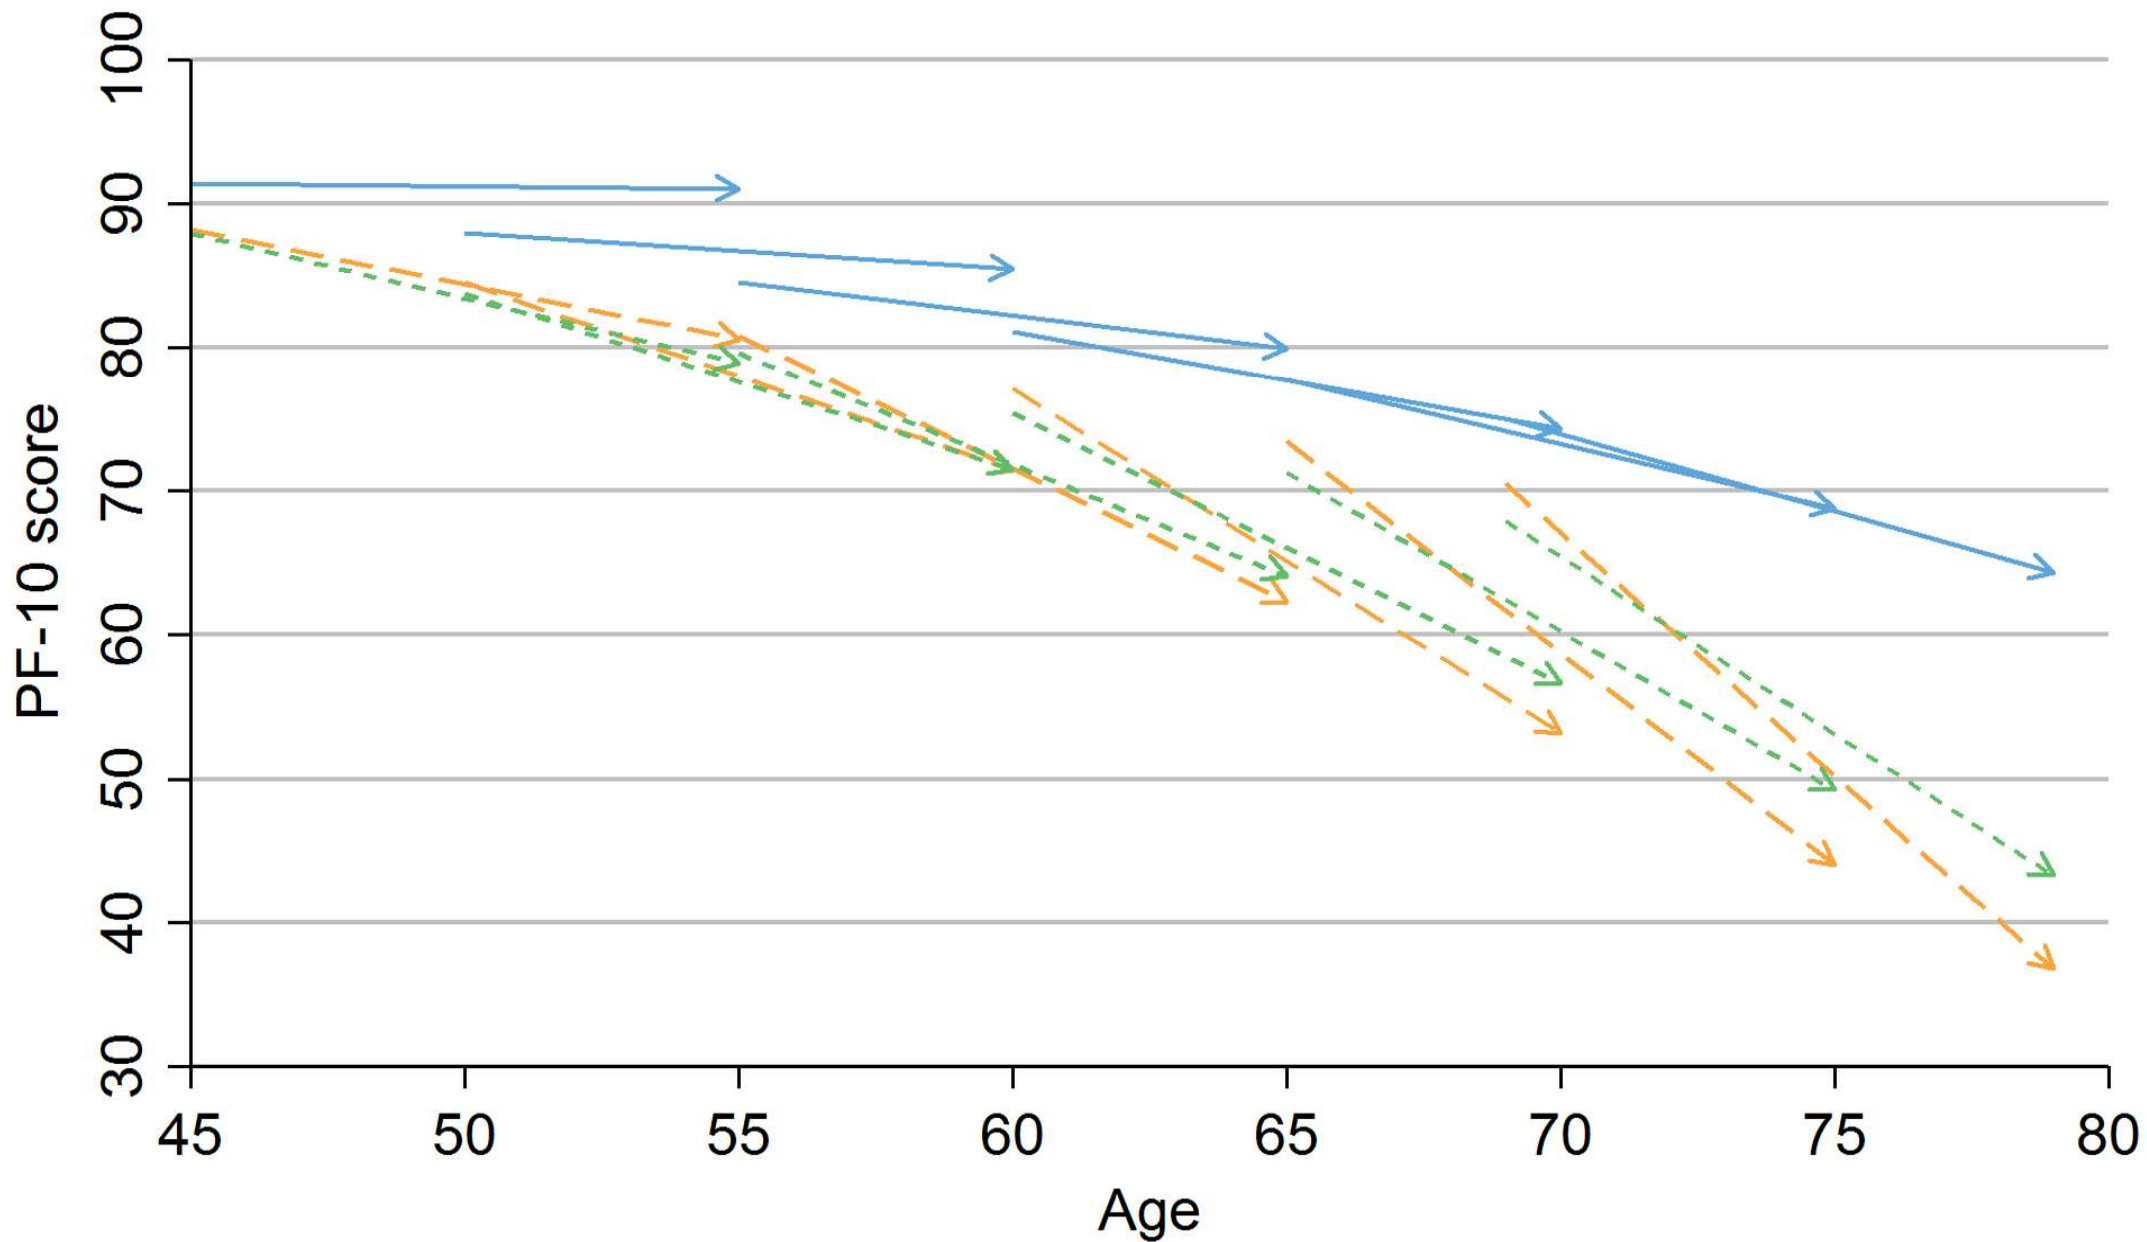

—→ Czech Republic

- - -→ Russia

- · - · -→ Poland
